# Supplementary material
Source: Springer Nature journal article supplement (https://www.springermedizin.de/resource/supplementary/12885_2014_4610_MOESM6_ESM.pdf/9466816)

**a** MCF-7 mammary fat pad injection

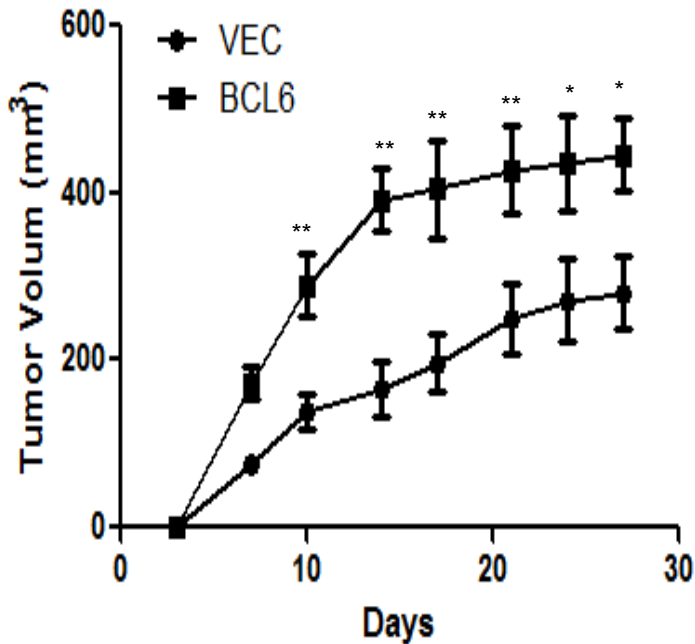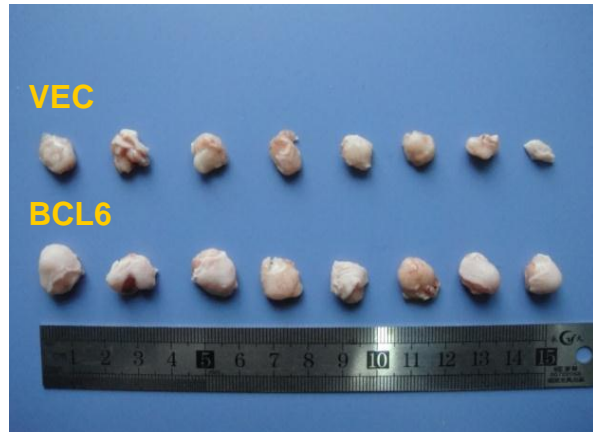

**b**

MCF-7-VEC

MCF-7-BCL6

Primary tumor

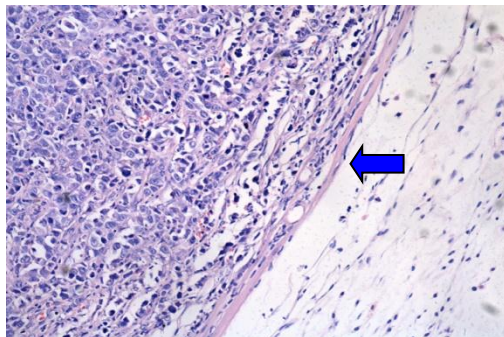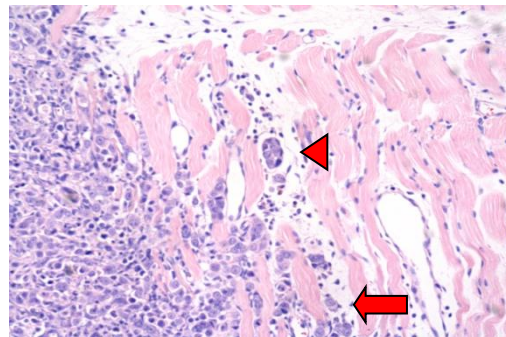

Supplement: MOESM6 [file 9466816]
